# Supplementary material
Source: Springer Nature journal article supplement (http://www.springermedizin.de/resource/supplementary/13063_2014_2234_MOESM1_ESM.pdf/9621702)
Supplement: MOESM1 [file 9621702]

Enrollment of pregnant women with moderate to severe depression who have been offered but have refused antidepressant treatment (N=36)

Baseline Assessment

1:1 Randomization,  
stratified by gestational age

Active tDCS (n=18)  
15 treatments over 3 weeks

Sham tDCS (n=18)  
15 treatments over 3 weeks

Outcomes: Retention,  
acceptability, & MADRS  
score after 3 weeks

Follow-Up: Assessments every 4  
weeks post-treatment until  
delivery, and at 4 and 12 weeks  
postpartum
